# Supplementary material for: X-cross/over: a web tool for graph-based estimation of meiotic crossover events in plants
Source: Research Square preprint supplement (doi:10.21203/rs.3.rs-7659215/v1), 2025-10-22
Supplement: Supplementary file 1 [file 813c64858d237127c947981c.xlsx]

## Sheet: DH3
Genotype	1A	1B	1D	2A	2B	2D	3A	3B	3D	4A	4B	4D	5A	5B	5D	6A	6B	6D	7A	7B	7D	Total CO	Variance
A061	3	1	1	1	2	1	2	1	0	3	0	0	1	2	0	2	1	0	3	2	1	27	0.965986
A062	2	2	1	4	1	2	3	4	0	4	2	0	0	1	1	3	2	0	1	0	1	34	1.75964
A063	2	1	1	3	1	0	2	3	0	3	0	0	0	1	0	0	4	0	2	1	1	25	1.48753
A064	1	0	0	1	0	1	3	1	0	2	0	0	1	2	0	2	1	0	0	0	2	17	0.820862
A065	0	0	1	2	0	0	1	2	0	1	0	0	1	2	0	0	2	0	1	3	1	17	0.820862
A066	2	1	1	3	1	1	3	0	0	3	0	0	2	1	0	2	1	1	4	1	1	28	1.26984
A067	2	1	1	3	1	0	2	3	0	3	0	0	0	1	0	0	4	0	2	1	1	25	1.48753
A068	1	0	0	1	0	1	3	1	0	2	0	0	1	2	0	2	1	0	0	0	2	17	0.820862
A069	0	0	1	2	0	0	1	2	0	1	0	0	1	2	0	0	2	0	1	3	1	17	0.820862
A070	2	1	1	3	1	1	3	0	0	3	0	0	2	1	0	2	1	1	4	1	1	28	1.26984
A071	1	1	1	2	2	2	3	1	0	1	0	0	3	2	1	0	1	0	2	1	2	26	0.848073
A072	0	1	1	2	1	0	2	1	0	3	1	0	2	1	0	3	1	0	4	0	0	23	1.32426
A073	0	1	0	1	1	1	1	1	0	1	1	0	0	1	1	2	2	0	2	1	1	18	0.408163
A074	2	2	2	5	1	0	2	0	0	3	0	0	0	3	0	2	0	0	2	1	1	26	1.80045
A075	3	2	0	1	1	0	0	2	0	3	1	0	1	3	0	1	2	0	2	0	1	23	1.13379
A076	0	1	0	1	1	1	1	1	0	1	1	0	0	1	1	2	2	0	2	1	1	18	0.408163
A077	2	1	3	4	0	2	0	2	0	0	0	0	3	0	1	0	1	0	1	1	1	22	1.37868
A078	1	0	0	3	0	1	3	1	0	4	0	0	2	1	0	2	0	0	3	2	1	24	1.55102
A079	2	1	0	2	0	0	2	1	0	1	0	0	1	2	0	3	1	1	1	1	1	20	0.712018
A080	0	2	2	4	1	1	1	2	0	2	0	0	0	2	0	1	2	0	1	1	1	23	1.03855
A081	0	1	1	3	2	1	1	0	0	2	0	0	1	1	0	2	1	0	3	2	1	22	0.902494
A082	1	1	1	1	1	1	2	2	0	2	1	0	2	1	0	3	1	1	5	2	2	30	1.19728
A083	0	1	1	2	2	0	1	2	0	2	0	0	2	0	0	4	2	0	2	2	2	25	1.20181
A084	1	0	2	2	1	0	1	1	0	3	0	0	0	1	0	3	0	0	0	1	1	17	0.9161
A085	2	1	1	1	1	1	2	0	0	1	0	0	0	1	1	1	0	0	2	2	1	18	0.503401
A086	1	0	2	2	1	0	1	1	0	3	0	0	0	1	0	3	0	0	0	1	1	17	0.9161
A087	0	3	1	1	1	1	2	2	0	0	1	0	1	1	1	1	1	0	1	1	2	21	0.571429
A088	0	1	1	1	1	0	1	4	0	1	0	0	2	3	0	2	0	0	2	2	1	22	1.18821
A089	0	1	1	1	1	0	1	4	0	3	0	0	2	3	0	2	0	0	2	2	1	24	1.36054
A090	1	3	0	2	1	0	3	1	0	0	0	0	1	4	0	2	0	0	1	2	2	23	1.4195
A091	2	1	1	2	0	2	2	2	0	1	1	0	2	2	1	3	0	0	1	0	0	23	0.848073
A092	1	1	1	2	1	1	2	1	0	1	0	0	3	2	0	4	1	0	0	2	0	23	1.13379
A093	1	1	0	3	0	0	2	2	0	2	1	0	3	1	0	1	0	0	1	0	0	18	0.979592
A094	0	2	2	4	2	1	1	2	0	1	3	0	2	2	0	1	0	1	2	1	1	28	1.07937
A095	0	2	1	5	3	1	2	0	0	1	0	0	2	1	0	1	2	0	2	5	1	29	2.14059
A096	0	3	0	0	1	0	1	1	0	1	0	0	3	4	0	5	0	0	3	4	0	26	2.6576
A097	0	2	1	2	0	0	1	1	0	4	0	0	1	3	0	1	0	0	2	2	0	20	1.28345
A098	1	2	2	3	0	0	0	2	0	3	1	0	3	3	0	1	0	1	3	3	0	28	1.55556
A099	0	0	1	1	3	0	3	1	0	1	0	0	1	2	1	2	0	0	0	1	1	18	0.884354
A100	0	3	0	0	1	0	1	1	0	3	0	0	3	4	0	5	0	0	3	4	0	28	2.79365
A101	0	2	1	2	0	0	1	1	0	4	0	0	1	3	0	1	0	0	2	2	0	20	1.28345
A102	1	1	0	4	0	0	0	2	0	0	0	0	1	1	1	0	0	0	1	1	0	13	0.902494
A103	0	0	1	2	1	0	2	2	0	3	0	0	0	1	0	2	1	0	2	2	1	20	0.902494
A106	2	2	1	3	1	0	1	1	0	1	0	0	1	1	1	2	1	0	2	2	1	23	0.657596
A107	2	0	0	3	2	1	2	3	0	1	0	0	1	2	0	0	1	0	5	3	1	27	1.82313
A108	2	1	2	3	0	1	1	0	0	4	0	0	1	2	0	2	2	0	3	1	2	27	1.34694
A109	3	2	1	3	3	1	1	2	0	1	1	0	1	3	0	2	0	0	3	2	2	31	1.20181
A110	1	1	0	0	2	0	2	2	0	2	0	0	2	3	0	1	0	0	4	0	1	21	1.33333
A111	0	0	2	3	1	0	3	1	0	1	1	0	2	1	0	3	0	0	2	2	2	24	1.17007
A112	2	2	1	3	1	1	3	0	0	3	1	0	2	3	1	2	0	0	2	0	1	28	1.1746
A113	2	1	1	0	0	2	4	1	0	1	0	0	1	2	0	1	2	1	1	0	0	20	0.997732
A114	0	1	2	4	1	1	1	1	0	3	0	0	1	0	0	2	2	1	3	2	3	28	1.36508
A115	0	1	2	4	1	1	1	1	0	3	0	0	1	0	0	2	2	1	3	2	3	28	1.36508
A116	1	0	1	4	0	1	2	2	0	2	2	0	0	0	0	3	0	0	1	2	0	21	1.33333
A117	1	0	0	0	1	2	2	0	0	3	1	0	3	0	0	2	1	2	3	2	1	24	1.17007
A118	2	2	0	3	1	0	1	1	0	0	0	0	0	0	0	2	2	0	0	1	1	16	0.848073
A119	2	0	2	3	1	0	2	2	0	3	0	0	3	0	0	3	1	0	0	2	0	24	1.45578
A120	2	0	0	4	0	0	4	2	0	1	0	0	4	3	0	2	0	0	4	2	1	29	2.4263
A121	4	0	1	4	1	1	1	3	0	4	0	0	2	4	0	4	2	0	2	1	1	35	2.31746
A122	2	1	1	2	2	0	1	1	0	3	1	0	0	3	0	0	1	1	3	1	1	24	0.979592
A123	2	1	0	3	1	0	1	1	0	1	1	0	1	4	1	2	1	0	2	0	1	23	1.03855
A124	2	2	0	0	2	1	2	1	0	4	0	0	0	4	0	1	1	0	1	2	1	24	1.45578
A125	1	0	1	4	0	2	0	0	0	3	0	0	3	1	0	1	0	1	2	4	0	23	1.80045
A126	1	1	0	3	1	1	2	2	0	2	0	0	2	1	1	3	1	0	2	1	1	25	0.820862
A127	3	2	1	0	1	0	2	2	0	2	0	0	1	3	0	3	2	0	0	0	1	23	1.22902
A128	1	0	1	0	1	0	1	2	0	1	0	0	2	2	0	0	1	0	3	2	1	18	0.789116
A129	0	1	2	3	1	0	3	2	0	2	1	0	0	2	0	1	3	0	3	1	1	26	1.22902
A130	2	0	1	2	2	1	2	0	0	4	1	0	0	3	1	3	0	0	5	1	2	30	1.95918
A131	0	1	1	2	0	0	2	0	0	2	0	0	2	2	0	2	0	0	3	2	0	19	1.03855
A132	1	1	1	2	1	1	2	1	0	1	1	0	1	1	0	2	0	0	2	0	1	19	0.46712
A133	0	0	0	4	0	0	1	2	0	2	0	0	2	1	1	3	0	1	2	1	1	21	1.2381
A134	2	0	0	2	3	1	3	2	0	0	2	0	2	1	0	4	2	0	3	0	0	27	1.63265
A135	1	1	1	2	1	1	0	1	0	1	0	0	2	2	1	2	0	0	2	1	1	20	0.521542
A136	2	1	1	1	4	1	3	0	0	4	0	0	2	3	0	2	1	1	2	1	1	30	1.48299
A137	2	0	0	2	3	1	3	2	0	0	2	0	2	1	0	4	2	0	3	0	0	27	1.63265
A138	2	0	0	2	3	1	3	2	0	0	2	0	2	1	0	4	2	0	3	0	0	27	1.63265
A139	1	0	0	1	2	1	2	1	0	2	0	0	0	0	0	1	2	1	1	0	1	16	0.562358
A140	1	0	0	1	2	1	2	1	0	1	0	0	0	0	0	1	2	1	1	0	1	15	0.489796
A141	0	2	1	3	1	1	1	2	0	3	0	0	0	2	0	2	1	0	1	0	1	21	0.952381
A142	2	0	1	1	3	1	3	4	0	1	0	0	2	3	0	2	0	0	1	1	1	26	1.4195
A143	2	0	1	1	3	1	3	4	0	1	0	0	2	3	0	2	0	0	1	1	1	26	1.4195
A144	2	0	3	5	4	1	2	0	0	2	1	0	2	0	0	3	2	0	2	1	1	31	1.96372
A145	2	0	1	2	0	0	1	2	0	2	0	0	1	3	0	3	0	1	2	1	1	22	0.997732
A146	1	2	0	4	1	0	2	3	0	3	0	0	3	1	0	1	1	0	3	2	0	27	1.63265
A147	1	0	1	2	2	1	2	2	0	3	0	0	2	0	0	1	1	1	1	1	1	22	0.712018
A148	2	2	0	3	0	3	0	2	0	2	2	0	3	1	1	0	0	0	2	3	1	27	1.34694
A149	2	1	2	4	1	0	1	4	0	2	0	0	0	1	0	4	1	0	1	0	1	25	1.77324
A150	2	1	1	2	2	1	0	2	0	3	1	0	1	2	0	0	1	1	3	0	2	25	0.9161
A151	0	0	1	0	2	0	2	2	0	0	0	0	1	3	1	1	0	0	2	0	0	15	0.870748
A152	2	3	0	2	2	0	1	2	0	0	0	0	0	1	0	2	2	1	1	3	0	22	1.09297
A153	2	1	0	2	1	1	2	2	0	2	0	0	1	1	0	1	1	0	1	1	1	20	0.521542
A154	1	1	0	2	2	0	0	0	0	1	0	0	2	1	0	2	1	0	1	1	0	15	0.585034
A155	2	0	0	2	4	1	1	1	0	3	0	0	2	1	1	2	2	1	0	2	2	27	1.15646
A156	0	3	0	3	1	0	2	4	0	0	1	0	2	2	0	2	3	0	4	0	1	28	1.93651
A157	0	2	0	3	1	0	2	4	0	2	1	0	2	2	0	2	3	0	4	0	1	29	1.75964
A158	0	0	2	3	0	0	2	1	0	2	0	0	3	1	0	1	1	0	2	2	1	21	1.04762
A159	0	4	1	3	0	0	4	2	0	1	0	0	0	0	1	2	3	2	4	2	1	30	2.05442
A160	0	2	0	0	2	0	0	2	0	1	0	0	2	1	0	3	2	0	1	1	0	17	0.9161
A161	0	2	0	0	2	0	0	2	0	1	0	0	2	1	0	3	2	0	1	1	0	17	0.9161
A162	0	1	1	2	2	0	1	0	0	2	0	0	2	1	0	4	1	0	2	1	1	21	1.04762
A163	1	1	0	2	3	0	2	1	0	1	1	0	2	3	0	1	1	0	1	0	2	22	0.902494
A164	1	2	0	3	1	1	1	0	0	3	1	0	4	0	0	2	3	1	0	1	1	25	1.39229
A165	1	2	1	4	0	0	2	1	0	0	1	0	3	3	0	3	1	0	1	1	1	25	1.39229
A166	0	0	0	1	2	0	2	0	0	2	0	0	3	2	1	2	1	1	4	1	2	24	1.26531
A167	1	1	0	1	1	0	2	0	0	1	1	0	2	0	0	1	0	0	2	1	0	14	0.507937
A168	1	1	0	1	1	0	2	0	0	1	1	0	2	0	0	1	0	0	2	1	0	14	0.507937
A169	1	1	1	2	2	1	0	1	0	3	0	0	1	3	0	1	2	1	2	1	1	24	0.789116
A170	1	1	1	1	1	1	0	3	0	1	1	0	1	1	1	2	1	1	2	1	1	22	0.426304
A171	2	2	2	2	0	2	4	2	0	4	1	0	1	4	0	4	0	0	5	3	0	38	2.63039
A172	2	2	2	2	0	2	4	2	0	4	1	0	1	4	0	4	0	0	5	3	0	38	2.63039
A173	2	2	1	3	1	0	5	0	0	2	2	0	1	4	0	2	2	0	6	1	1	35	2.69841
																					Variance	25.6554	136.916
																					Average	23.5045
																					SD	5.08809
