# Supplementary material for: X-cross/over: a web tool for graph-based estimation of meiotic crossover events in plants
Source: Research Square preprint supplement (doi:10.21203/rs.3.rs-7659215/v1), 2025-10-22
Supplement: Supplementary file 2 [file ab17dae9667cc1b4ae802277.xlsx]

## Sheet: HEB01
genotype	chr1H	chr2H	chr3H	chr4H	chr5H	chr6H	chr7H	Total	Variance	Delta of Totals	Delta 1H	Delta 2H	Delta 3H	Delta 4H	Delta 5H	Delta 6H	Delta 7H	Ref 1H	Ref 2H	Ref 3H	Ref 4H	Ref 5H	Ref 6H	Ref 7H	Ref Total	Ref variance
HEB_01_003	3	5	2	2	4	1	2	19	1.63265	2	0	-2	0	0	0	0	0	3	3	2	2	4	1	2	17	0.816327
HEB_01_013	4	0	3	2	4	2	3	18	1.67347	22	0	0	1	0	20	0	1	4	0	4	2	24	2	4	40	57.6327
HEB_01_021	3	4	4	5	4	1	2	23	1.63265	4	1	0	0	1	2	0	0	4	4	4	6	6	1	2	27	2.97959
HEB_01_022	1	6	6	3	2	0	2	20	4.69388	12	4	3	3	1	1	0	0	5	9	9	4	3	0	2	32	9.95918
HEB_01_023	3	2	4	8	2	0	1	20	5.83673	3	0	0	1	2	0	0	0	3	2	5	10	2	0	1	23	9.63265
HEB_01_025	3	9	2	2	4	0	1	21	7.42857	8	0	7	0	0	-2	0	3	3	16	2	2	2	0	4	29	24.6939
HEB_01_031	3	1	2	3	2	4	2	17	0.816327	22	0	0	4	0	0	18	0	3	1	6	3	2	22	2	39	47.102
HEB_01_032	3	2	2	4	3	4	3	21	0.571429	10	3	0	0	0	-1	7	1	6	2	2	4	2	11	4	31	9.10204
HEB_01_033	1	4	3	4	0	0	2	14	2.57143	4	1	0	0	3	0	0	0	2	4	3	7	0	0	2	18	5.10204
HEB_01_038	2	2	3	3	2	1	6	19	2.20408	21	6	0	0	6	2	3	4	8	2	3	9	4	4	10	40	8.77551
HEB_01_041	0	0	0	1	3	4	3	11	2.53061	1	0	0	0	0	0	0	1	0	0	0	1	3	4	4	12	3.06122
HEB_01_042	2	0	0	1	3	1	3	10	1.38776	6	0	0	0	1	0	4	1	2	0	0	2	3	5	4	16	3.06122
HEB_01_047	4	0	0	1	3	3	2	13	2.12245	2	0	0	0	0	0	0	2	4	0	0	1	3	3	4	15	2.69388
HEB_01_050	2	0	0	0	2	6	3	13	4.12245	3	0	0	0	0	0	3	0	2	0	0	0	2	9	3	16	8.77551
HEB_01_053	2	4	4	3	3	3	6	25	1.38776	2	0	1	0	0	1	0	0	2	5	4	3	4	3	6	27	1.55102
HEB_01_055	2	4	1	3	3	5	4	22	1.55102	6	1	1	0	1	0	3	0	3	5	1	4	3	8	4	28	4
HEB_01_057	0	2	3	6	1	3	8	23	6.77551	4	0	0	4	0	0	0	0	0	2	7	6	1	3	8	27	8.40816
HEB_01_071	2	0	4	3	8	3	6	26	5.91837	3	1	0	1	0	0	1	0	3	0	5	3	8	4	6	29	5.55102
HEB_01_072	1	0	2	4	6	3	3	19	3.34694	4	2	0	0	0	0	1	1	3	0	2	4	6	4	4	23	3.06122
HEB_01_074	1	0	3	3	2	1	4	14	1.71429	5	0	0	0	0	0	0	5	1	0	3	3	2	1	9	19	7.63265
HEB_01_075	3	0	4	3	3	6	6	25	3.67347	5	1	0	2	0	1	-1	2	4	0	6	3	4	5	8	30	5.34694
HEB_01_077	2	0	1	0	4	0	3	10	2.2449	0	0	0	0	0	0	0	0	2	0	1	0	4	0	3	10	2.2449
HEB_01_079	2	0	6	2	3	2	4	19	3.06122	1	0	0	1	0	0	0	0	2	0	7	2	3	2	4	20	4.12245
HEB_01_080	2	0	2	1	2	2	4	13	1.26531	2	0	0	2	0	0	0	0	2	0	4	1	2	2	4	15	1.83673
HEB_01_085	0	2	1	2	2	1	2	10	0.530612	0	0	0	1	0	0	-1	0	0	2	2	2	2	0	2	10	0.816327
HEB_01_086	0	0	4	2	2	1	2	11	1.67347	1	0	0	0	0	1	0	0	0	0	4	2	3	1	2	12	1.91837
HEB_01_087	0	2	6	0	0	1	4	13	4.69388	0	0	0	0	0	0	0	0	0	2	6	0	0	1	4	13	4.69388
HEB_01_090	0	1	3	3	4	1	6	18	3.67347	4	0	0	1	2	1	0	0	0	1	4	5	5	1	6	22	4.97959
HEB_01_091	2	1	1	0	3	4	0	11	1.95918	1	-1	0	2	0	-2	0	0	1	1	3	0	1	4	0	10	1.95918
HEB_01_092	4	2	1	0	3	4	2	16	1.91837	14	-1	7	3	0	3	2	0	3	9	4	0	6	6	2	30	7.63265
HEB_01_093	4	3	2	0	2	4	1	16	1.91837	2	-1	0	0	0	0	0	3	3	3	2	0	2	4	4	18	1.67347
HEB_01_096	2	1	1	0	3	2	2	11	0.816327	3	0	0	0	0	2	0	1	2	1	1	0	5	2	3	14	2.28571
HEB_01_097	2	1	3	0	1	0	4	11	1.95918	0	-1	0	1	0	0	0	0	1	1	4	0	1	0	4	11	2.53061
HEB_01_099	2	4	3	0	5	2	3	19	2.20408	6	3	1	1	0	1	0	0	5	5	4	0	6	2	3	25	3.67347
HEB_01_101	1	4	0	0	2	3	3	13	2.12245	1	0	1	0	0	0	0	0	1	5	0	0	2	3	3	14	2.85714
HEB_01_103	3	5	2	1	2	2	4	19	1.63265	0	-1	0	0	0	0	0	1	2	5	2	1	2	2	5	19	2.20408
HEB_01_104	1	3	1	1	0	3	1	10	1.10204	0	0	0	0	0	0	0	0	1	3	1	1	0	3	1	10	1.10204
HEB_01_106	1	4	3	1	1	3	3	16	1.34694	6	0	2	4	0	0	-2	2	1	6	7	1	1	1	5	22	6.40816
HEB_01_109	2	6	1	1	3	0	2	15	3.26531	10	0	-2	0	0	12	0	0	2	4	1	1	15	0	2	25	23.102
HEB_01_112	2	0	3	4	2	2	4	17	1.67347	5	0	0	0	1	3	0	1	2	0	3	5	5	2	5	22	3.26531
HEB_01_121	0	2	3	2	5	2	0	14	2.57143	4	0	0	0	0	0	4	0	0	2	3	2	5	6	0	18	4.53061
HEB_01_122	2	1	4	2	6	4	3	22	2.40816	34	8	0	-2	0	4	23	1	10	1	2	2	10	27	4	56	72.2857
HEB_01_123	3	2	4	4	4	6	0	23	3.06122	4	0	0	0	0	3	1	0	3	2	4	4	7	7	0	27	5.55102
HEB_01_124	1	1	6	2	2	4	2	18	2.81633	1	0	0	0	0	0	0	1	1	1	6	2	2	4	3	19	2.77551
HEB_01_126	2	2	4	2	2	4	4	20	0.979592	11	0	0	1	3	2	4	1	2	2	5	5	4	8	5	31	3.67347
HEB_01_127	2	1	2	2	3	4	0	14	1.42857	3	0	0	0	2	1	0	0	2	1	2	4	4	4	0	17	2.2449
HEB_01_128	2	0	3	3	5	2	3	18	1.95918	2	0	0	2	0	0	0	0	2	0	5	3	5	2	3	20	2.69388
HEB_01_130	2	1	3	4	4	2	2	18	1.10204	6	0	0	1	0	0	5	0	2	1	4	4	4	7	2	24	3.38776
HEB_01_131	0	3	5	1	1	4	1	15	2.97959	0	0	0	0	0	0	0	0	0	3	5	1	1	4	1	15	2.97959
HEB_01_132	0	3	4	0	2	2	2	13	1.83673	2	0	0	-2	0	0	0	0	0	3	2	0	2	2	2	11	1.10204
HEB_01_133	2	2	4	1	0	1	2	12	1.34694	3	0	0	2	0	0	0	1	2	2	6	1	0	1	3	15	3.26531
HEB_01_134	2	3	6	1	1	2	0	15	3.26531	2	2	0	0	0	0	0	0	4	3	6	1	1	2	0	17	3.67347
HEB_01_140	1	3	5	1	2	1	2	15	1.83673	0	0	0	-2	0	1	0	1	1	3	3	1	3	1	3	15	0.979592
HEB_01_328	2	0	4	4	4	2	2	18	1.95918	1	1	0	0	0	0	0	0	3	0	4	4	4	2	2	19	1.91837
							Variance	18.5007	132.204	5.14815														Variance	82.2469	419.306

## Sheet: HEB02
genotype	chr1H	chr2H	chr3H	chr4H	chr5H	chr6H	chr7H	Total	Variance	Delta of Totals	Delta 1H	Delta 2H	Delta 3H	Delta 4H	Delta 5H	Delta 6H	Delta 7H	Ref 1H	Ref 2H	Ref 3H	Ref 4H	Ref 5H	Ref 6H	Ref 7H	Ref Total	Ref variance
HEB_02_003	4	3	2	0	3	1	2	15	1.55102	8	1	2	0	0	0	4	1	5	5	2	0	3	5	3	23	3.91837
HEB_02_006	3	8	5	0	2	7	2	27	7.26531	0	1	-1	1	0	0	-1	0	4	7	6	0	2	6	2	27	5.83673
HEB_02_008	2	3	4	0	4	0	2	15	2.40816	0	0	1	0	0	1	0	-2	2	4	4	0	5	0	0	15	5.71429
HEB_02_009	1	3	3	0	4	2	2	15	1.55102	4	0	0	0	0	3	1	0	1	3	3	0	7	3	2	19	2.91837
HEB_02_012	2	0	0	0	5	0	7	14	7.14286	1	1	0	0	0	0	0	-2	3	0	0	0	5	0	5	13	3.7398
HEB_02_016	3	4	1	0	2	1	3	14	1.71429	1	1	-2	1	0	1	0	0	4	2	2	0	3	1	3	15	2.83673
HEB_02_017	2	3	1	0	5	2	4	17	2.53061	1	0	0	1	0	0	0	0	2	3	2	0	5	2	4	18	2.51531
HEB_02_018	2	3	0	1	5	0	3	14	2.85714	19	9	4	0	0	-1	0	7	11	7	0	1	4	0	10	33	21.25
HEB_02_020	5	3	1	1	3	1	1	15	2.12245	9	0	1	1	0	6	1	0	5	4	2	1	9	2	1	24	5.08673
HEB_02_021	0	2	2	3	2	0	4	13	1.83673	5	0	0	0	4	0	0	1	0	2	2	7	2	0	5	18	3.7398
HEB_02_022	0	4	3	2	2	0	4	15	2.40816	5	0	-1	2	2	0	0	2	0	3	5	4	2	0	6	20	5.20408
HEB_02_033	0	3	5	2	2	0	5	17	3.67347	23	0	2	1	0	0	0	20	0	5	6	2	2	0	25	40	53.6939
HEB_02_036	0	0	3	2	2	0	1	8	1.26531	2	0	0	0	1	1	0	0	0	0	3	3	3	0	1	10	1.83673
HEB_02_040	0	1	3	2	0	0	2	8	1.26531	3	0	2	0	1	0	0	0	0	3	3	3	0	0	2	11	1.96429
HEB_02_041	1	3	3	2	4	2	4	19	1.06122	1	0	3	0	0	-2	0	0	1	6	3	2	2	2	4	20	2.10714
HEB_02_054	2	4	0	0	2	2	0	10	1.95918	4	1	3	0	0	0	0	0	3	7	0	0	2	2	0	14	4.94388
HEB_02_058	1	0	1	5	1	4	0	12	3.34694	20	0	0	18	2	0	0	0	1	0	19	7	1	4	0	32	29.5153
HEB_02_063	3	2	1	1	3	2	0	12	1.06122	3	0	0	0	0	3	0	0	3	2	1	1	6	2	0	15	2.69388
HEB_02_064	2	4	1	3	2	4	0	16	1.91837	0	0	-2	0	0	2	0	0	2	2	1	3	4	4	0	16	2.2449
HEB_02_067	5	2	1	2	4	2	0	16	2.4898	5	2	0	0	0	3	0	0	7	2	1	2	7	2	0	21	5.78061
HEB_02_069	3	2	1	4	4	4	0	18	2.2449	16	0	0	12	0	4	0	0	3	2	13	4	8	4	0	34	16.0612
HEB_02_071	3	4	2	1	1	1	4	16	1.63265	3	0	0	2	0	0	0	1	3	4	4	1	1	1	5	19	3.91837
HEB_02_078	2	2	3	3	3	2	2	17	0.244898	13	0	2	0	0	4	4	3	2	4	3	3	7	6	5	30	5.12245
HEB_02_083	1	2	4	3	5	1	3	19	1.91837	3	1	1	0	0	0	0	1	2	3	4	3	5	1	4	22	4.20918
HEB_02_084	3	4	5	7	2	5	6	32	2.53061	3	-2	1	0	2	0	0	2	1	5	5	9	2	5	8	35	7.2449
HEB_02_085	4	4	3	7	3	2	3	26	2.20408	4	0	0	3	1	0	0	0	4	4	6	8	3	2	3	30	5.83673
HEB_02_086	4	2	7	5	1	2	2	23	3.91837	21	2	2	1	12	2	2	0	6	4	8	17	3	4	2	44	19.8163
HEB_02_088	4	2	4	2	2	3	2	19	0.77551	15	3	3	2	2	0	2	3	7	5	6	4	2	5	5	34	8.06122
HEB_02_089	3	4	3	3	3	0	4	20	1.55102	12	0	1	1	0	10	0	0	3	5	4	3	13	0	4	32	8.38776
HEB_02_093	1	1	1	2	2	4	4	15	1.55102	6	3	0	0	1	0	0	2	4	1	1	3	2	4	6	21	3.06633
HEB_02_094	5	3	4	3	2	4	5	26	1.06122	5	0	3	0	0	0	2	0	5	6	4	3	2	6	5	31	2.16837
HEB_02_096	2	1	3	5	2	2	4	19	1.63265	14	2	0	6	0	0	0	6	4	1	9	5	2	2	10	33	6.45408
HEB_02_101	1	2	5	0	5	2	2	17	3.10204	2	0	0	0	0	2	0	0	1	2	5	0	7	2	2	19	3.77551
HEB_02_106	2	4	1	0	3	0	2	12	1.91837	14	0	0	1	0	3	0	10	2	4	2	0	6	0	12	26	13.3112
HEB_02_112	2	2	3	2	4	2	2	17	0.530612	4	0	0	0	0	1	3	0	2	2	3	2	5	5	2	21	3.08673
HEB_02_114	3	2	2	1	4	0	2	14	1.42857	5	1	4	0	0	0	0	0	4	6	2	1	4	0	2	19	3.53061
HEB_02_115	1	6	6	2	2	2	2	21	3.71429	3	0	0	3	0	0	0	0	1	6	9	2	2	2	2	24	7.88265
HEB_02_117	4	2	1	2	5	2	2	18	1.67347	2	0	0	0	2	0	0	0	4	2	1	4	5	2	2	20	3.45408
HEB_02_122	3	2	0	2	1	3	3	14	1.14286	0	0	0	0	0	0	0	0	3	2	0	2	1	3	3	14	1.55102
HEB_02_125	2	2	0	2	1	2	0	9	0.77551	6	4	0	0	0	0	2	0	6	2	0	2	1	4	0	15	3.67347
HEB_02_127	1	2	0	0	1	3	5	12	2.77551	2	0	0	0	0	0	2	0	1	2	0	0	1	5	5	14	3.10204
HEB_02_130	2	2	0	2	2	3	3	14	0.857143	2	0	0	0	0	2	0	0	2	2	0	2	4	3	3	16	2.69388
HEB_02_138	1	1	4	2	2	2	6	18	2.81633	1	0	0	0	0	1	0	0	1	1	4	2	3	2	6	19	2.08673
HEB_02_146	1	1	2	2	5	3	2	16	1.63265	3	0	1	0	2	0	0	0	1	2	2	4	5	3	2	19	4.63776
HEB_02_147	1	1	2	1	4	4	2	15	1.55102	7	0	2	0	0	2	0	3	1	3	2	1	6	4	5	22	3.4949
							Variance	22.8662	96.6122	6.22222														Variance	63.4844	314.168

## Sheet: HEB03
genotype	chr1H	chr2H	chr3H	chr4H	chr5H	chr6H	chr7H	Total	Variance	Delta of Totals	Delta 1H	Delta 2H	Delta 3H	Delta 4H	Delta 5H	Delta 6H	Delta 7H	Ref 1H	Ref 2H	Ref 3H	Ref 4H	Ref 5H	Ref 6H	Ref 7H	Ref Total	Ref Variance
HEB_03_006	2	2	5	3	0	2	2	16	1.91837	8	0	1	7	0	0	0	0	2	3	12	3	0	2	2	24	13.102
HEB_03_007	2	5	3	3	2	1	4	20	1.55102	3	0	0	0	0	0	0	3	2	5	3	3	2	1	7	23	3.63265
HEB_03_012	2	3	1	1	6	3	0	16	3.34694	23	3	0	1	0	-1	20	0	5	3	2	1	5	23	0	39	53.6735
HEB_03_013	6	2	3	1	3	2	4	21	2.28571	5	0	3	0	0	0	1	1	6	5	3	1	3	3	5	26	2.4898
HEB_03_014	2	2	2	4	2	3	0	15	1.26531	3	1	0	0	1	1	0	0	3	2	2	5	3	3	0	18	1.95918
HEB_03_015	2	2	3	3	3	3	2	18	0.244898	7	2	2	0	0	3	0	0	4	4	3	3	6	3	2	25	1.38776
HEB_03_018	3	2	3	1	3	3	4	19	0.77551	13	3	1	2	1	4	1	1	6	3	5	2	7	4	5	32	2.53061
HEB_03_021	2	2	4	2	3	2	2	17	0.530612	4	0	0	0	1	1	2	0	2	2	4	3	4	4	2	21	0.857143
HEB_03_025	2	0	1	2	1	3	2	11	0.816327	4	4	0	0	0	0	0	0	6	0	1	2	1	3	2	15	3.26531
HEB_03_027	4	0	3	2	6	0	2	17	3.95918	3	1	0	0	0	2	0	0	5	0	3	2	8	0	2	20	6.97959
HEB_03_029	2	2	5	2	4	3	2	20	1.26531	26	2	0	8	1	15	0	0	4	2	13	3	19	3	2	46	38.5306
HEB_03_032	2	2	3	0	1	4	2	14	1.42857	1	0	0	0	0	0	-1	0	2	2	3	0	1	3	2	13	0.979592
HEB_03_033	4	2	5	1	3	0	0	15	3.26531	1	1	0	0	0	0	0	0	5	2	5	1	3	0	0	16	3.91837
HEB_03_035	6	2	2	1	3	2	2	18	2.2449	4	0	1	0	2	1	0	0	6	3	2	3	4	2	2	22	1.83673
HEB_03_036	0	2	4	1	2	1	1	11	1.38776	0	0	0	0	0	0	0	0	0	2	4	1	2	1	1	11	1.38776
HEB_03_037	2	4	5	2	0	2	3	18	2.2449	4	0	2	2	0	0	0	0	2	6	7	2	0	2	3	22	5.26531
HEB_03_039	4	2	5	0	4	1	0	16	3.63265	7	3	1	3	0	0	0	0	7	3	8	0	4	1	0	23	9.06122
HEB_03_040	2	0	3	1	3	1	5	15	2.40816	2	0	0	0	2	0	0	0	2	0	3	3	3	1	5	17	2.2449
HEB_03_045	0	1	5	0	4	1	2	13	3.26531	2	0	1	1	0	1	0	-1	0	2	6	0	5	1	1	15	4.97959
HEB_03_048	0	1	3	2	2	0	2	10	1.10204	4	0	0	0	2	0	0	2	0	1	3	4	2	0	4	14	2.57143
HEB_03_052	2	2	2	0	2	1	2	11	0.530612	2	0	1	0	0	1	0	0	2	3	2	0	3	1	2	13	0.979592
HEB_03_053	2	2	1	2	5	0	0	12	2.4898	3	0	2	0	2	-1	0	0	2	4	1	4	4	0	0	15	2.97959
HEB_03_055	2	0	1	4	3	0	1	11	1.95918	0	0	0	0	0	0	0	0	2	0	1	4	3	0	1	11	1.95918
HEB_03_057	2	3	6	1	1	1	1	15	2.97959	0	0	0	-2	2	0	0	0	2	3	4	3	1	1	1	15	1.26531
HEB_03_062	2	1	2	1	5	1	1	13	1.83673	4	0	0	0	0	1	0	3	2	1	2	1	6	1	4	17	3.10204
HEB_03_064	0	0	2	2	1	2	4	11	1.67347	0	0	0	0	0	1	-2	1	0	0	2	2	2	0	5	11	2.81633
HEB_03_065	2	0	0	1	1	1	2	7	0.571429	1	0	0	0	1	0	0	0	2	0	0	2	1	1	2	8	0.693878
HEB_03_071	6	1	2	1	2	1	3	16	2.77551	4	0	0	2	0	0	0	2	6	1	4	1	2	1	5	20	3.83673
HEB_03_073	3	1	3	1	6	1	6	21	4.28571	14	0	0	0	0	12	0	2	3	1	3	1	18	1	8	35	33.4286
HEB_03_076	2	0	3	0	1	1	3	10	1.38776	3	1	0	0	0	0	1	1	3	0	3	0	1	2	4	13	2.12245
HEB_03_077	2	1	1	1	6	0	3	14	3.42857	12	0	0	0	3	5	0	4	2	1	1	4	11	0	7	26	13.6327
HEB_03_080	4	0	2	1	3	0	0	10	2.2449	0	0	0	0	0	0	0	0	4	0	2	1	3	0	0	10	2.2449
HEB_03_085	2	3	4	3	7	2	4	25	2.53061	3	2	0	0	1	1	-2	1	4	3	4	4	8	0	5	28	4.85714
HEB_03_089	4	2	5	2	6	3	2	24	2.2449	4	0	0	0	0	0	0	4	4	2	5	2	6	3	6	28	2.57143
HEB_03_102	0	4	1	4	4	0	2	15	2.97959	3	0	0	0	1	3	0	-1	0	4	1	5	7	0	1	18	6.53061
HEB_03_106	1	4	2	2	6	2	1	18	2.81633	2	0	1	0	0	1	0	0	1	5	2	2	7	2	1	20	4.40816
HEB_03_107	1	6	0	5	4	2	0	18	5.10204	2	1	0	0	1	0	0	0	2	6	0	6	4	2	0	20	5.55102
HEB_03_111	1	3	2	5	2	3	1	17	1.67347	7	2	1	0	-1	5	0	0	3	4	2	4	7	3	1	24	3.10204
HEB_03_129	0	1	1	2	3	5	3	15	2.40816	5	0	0	0	0	0	2	3	0	1	1	2	3	7	6	20	6.12245
HEB_03_138	1	2	3	1	1	3	1	12	0.77551	11	0	0	0	0	1	9	1	1	2	3	1	2	12	2	23	13.0612
HEB_03_139	3	1	2	3	5	2	3	19	1.34694	4	0	0	0	0	2	1	1	3	1	2	3	7	3	4	23	3.06122
HEB_03_140	1	2	2	3	2	1	2	13	0.408163	4	0	0	2	0	1	0	1	1	2	4	3	3	1	3	17	1.10204
HEB_03_141	2	2	4	2	2	2	5	19	1.34694	28	0	0	0	0	0	0	28	2	2	4	2	2	2	33	47	115.633
HEB_03_142	2	1	3	2	2	3	2	15	0.408163	9	0	1	6	2	0	0	0	2	2	9	4	2	3	2	24	5.67347
HEB_03_144	2	1	0	4	3	0	3	13	2.12245	2	0	1	0	0	0	0	1	2	2	0	4	3	0	4	15	2.40816
HEB_03_145	0	0	3	2	1	2	1	9	1.06122	6	0	0	0	1	0	1	4	0	0	3	3	1	3	5	15	2.97959
HEB_03_147	2	1	2	4	5	0	5	19	3.34694	2	0	0	0	0	3	0	-1	2	1	2	4	8	0	4	21	6
HEB_03_149	0	2	3	4	3	3	2	17	1.38776	15	0	1	1	0	10	1	2	0	3	4	4	13	4	4	32	13.6735
HEB_03_153	1	1	3	2	4	3	1	15	1.26531	5	0	0	4	0	1	0	0	1	1	7	2	5	3	1	20	4.69388
HEB_03_156	3	1	1	0	2	1	5	13	2.40816	1	0	0	0	0	1	0	0	3	1	1	0	3	1	5	14	2.57143
HEB_03_162	1	4	4	2	2	1	2	16	1.34694	5	0	2	0	0	1	2	0	1	6	4	2	3	3	2	21	2.28571
HEB_03_163	1	4	2	2	1	4	6	20	2.97959	1	0	0	0	0	0	0	-1	1	4	2	2	1	4	5	19	2.20408
HEB_03_166	1	4	4	2	2	5	6	24	2.81633	3	0	0	0	0	1	1	1	1	4	4	2	3	6	7	27	3.83673
HEB_03_170	1	4	2	3	4	1	4	19	1.63265	4	0	1	1	1	0	0	1	1	5	3	4	4	1	5	23	2.4898
HEB_03_172	0	3	2	2	2	1	6	16	3.06122	9	0	2	0	5	1	3	-2	0	5	2	7	3	4	4	25	4.2449
							Variance	15.0202	112.571	5.49091														Variance	64.0826	448.776
